# Supplementary material for: VEGF Stimulates Activation of ERK5 in the Absence of C-Terminal Phosphorylation Preventing Nuclear Localization and Facilitating AKT Activation in Endothelial Cells
Source: Cells. 2023 Mar 22;12(6):967. doi: 10.3390/cells12060967 (PMC10047687; doi:10.3390/cells12060967)
Supplement: Supplementary file 1 [file cells-12-00967-s001.zip › cells-2225965-supplementary.pdf]

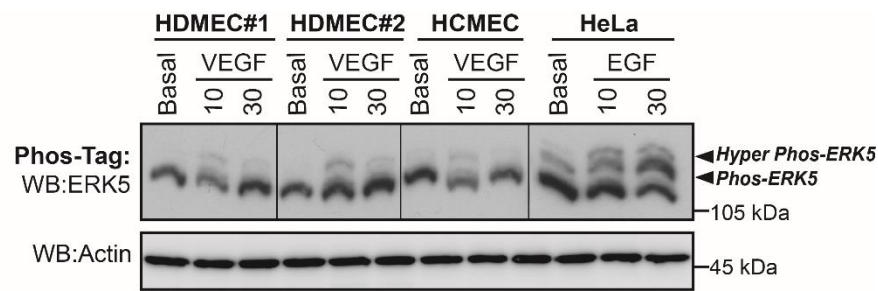

**Figure S1. VEGF and EGF stimulate differential ERK5 phosphorylation.** Human dermal microvascular endothelial cells (HDMECs) from two different donors and human cardiac microvascular endothelial cells (HCMECs) were serum starved overnight prior to stimulation for 10 mins with VEGF (50ng/ml). HeLa cells were serum starved overnight prior to stimulation for 10 mins with EGF (50ng/ml). Cells were lysed in RIPA buffer and lysates were resolved by 10% SDS-PAGE (Actin) or Phos-tag SDS-PAGE (ERK5) and analysed by western blotting. Results are from one experiment representative of two independent experiments.
